# Supplementary material for: Functionalized metal–organic framework modified membranes with ultralong cyclability and superior capacity for zinc/bromine flowless batteries
Source: Royal Society of Chemistry journal article supplement (doi:10.1039/d4ta01005a), 2024-01-01
Supplement: d4ta01005a1.pdf [file d4ta01005a1.pdf]

## Electronic Supporting Information (ESI)

# Functionalized Metal-Organic Framework Modified Membrane with Ultralong Cyclability and Superior Capacity for Zinc/Bromine Flowless Battery

Dabin Han<sup>a</sup>, Kyungjae Shin<sup>b</sup>, Hee-Tak Kim<sup>b</sup> and Sangaraju Shanmugam<sup>a\*</sup>

<sup>a</sup>Department of Energy Science & Engineering, Daegu Gyeongbuk Institute of Science & Technology (DGIST), Daegu 42988, Republic of Korea.

<sup>b</sup>Department of Chemical and Biomolecular Engineering, Korea Advanced Institute of Science and Technology (KAIST), Daejeon 34141, Republic of Korea.

\*E-mail: [sangarajus@dgist.ac.kr](mailto:sangarajus@dgist.ac.kr)

## Table of Contents

| Label            | Caption                                                                                          | Page no. |
|------------------|--------------------------------------------------------------------------------------------------|----------|
| <b>Table S1</b>  | Summary of ZBFLB performance comparison                                                          | S4       |
| <b>Fig. S1</b>   | The XRD results of UiO-66, U-A and U-AS                                                          | S5       |
| <b>Fig. S2</b>   | SEM images and FT-IR results of U-A and U-AS, TGA curves of UiO-66, U-A and U-AS                 | S6~S7    |
| <b>Fig. S3</b>   | High-resolution S2p and N1s spectrums of U-A and U-AS in XPS                                     | S8       |
| <b>Table S2</b>  | The CHNS elemental analysis of UiO-66, U-A and U-AS                                              | S9       |
| <b>Fig. S4</b>   | Raman spectrum of U-A and U-AS                                                                   | S10      |
| <b>Fig. S5</b>   | TEM image and element mapping images of U-A and U-AS                                             | S11      |
| <b>Fig. S6</b>   | EDX spectrum of U-A and U-AS                                                                     | S12      |
| <b>Fig. S7</b>   | SEM images, XRD patterns, Raman spectrum and XPS spectrum of U-A after hydrolytic stability test | S13      |
| <b>Fig. S8</b>   | XPS spectrums after hydrolytic stability test of U-A                                             | S14      |
| <b>Fig. S9</b>   | Images of NF/UiO-66, NF/U-A and NF/U-AS membranes                                                | S15      |
| <b>Table. S3</b> | Properties of membranes                                                                          | S16      |
| <b>Fig. S10</b>  | Contact angle of NRE-212, NF/UiO-66, NF/U-A and NF/U-AS                                          | S17      |
| <b>Fig. S11</b>  | Schematic of Zinc/Bromine flowless single-cell                                                   | S18      |
| <b>Fig. S12</b>  | Charge-discharge voltage curves of ZBFLB at 10% DOC                                              | S19      |
| <b>Fig. S13</b>  | Charge-discharge voltage curves of ZBFLB under different current densities at 10% DOC            | S20      |
| <b>Fig. S14</b>  | The ZBFLB performance test with 1% DOC                                                           | S21      |
| <b>Fig. S15</b>  | FE-SEM images of NF/U-A surface after 3000 cycles at 1% DOC                                      | S22      |
| <b>Fig. S16</b>  | FE-SEM images of Zn deposition on anode at 1% DOC depending on membrane                          | S23      |
| <b>Fig. S17</b>  | FE-SEM images of Zn deposition on anode using Zn symmetric cell                                  | S24      |
| <b>Fig. S18</b>  | Cycling of Zn symmetric cell and Chronopotentiometry of Zn                                       | S25      |

|                                            |                                                                                                |         |
|--------------------------------------------|------------------------------------------------------------------------------------------------|---------|
|                                            | symmetric cells at 1 mA cm <sup>-2</sup>                                                       |         |
| <b>Fig. S19</b>                            | Charge-discharge voltage curves of ZBFLB at 40% DOC according to cycles                        | S26     |
| <b>Fig. S20</b>                            | The OCV decay curves of NRE-212, NF/U-A, and NF/U-AS after 40% DOC at 10 mA cm <sup>-2</sup> . | S27     |
| <b>Fig. S21</b>                            | FE-SEM images of NRE-212, NF/U-A and NF/U-AS surfaces after cyclability test at 40% DOC        | S28     |
| <b>Fig. S22</b>                            | The cyclability results of NF/U-AS at 40% DOC                                                  | S29     |
| <b>Fig. S23</b>                            | FE-SEM images of NF/U-AS after cyclability test at 40% DOC over 1400 h.                        | S30     |
| <b>Experiment</b>                          | Measurement of ion conductivity, ion transport number, and preparation of Zn symmetric cells   | S31~32  |
| <b>Optimization of U-A and U-AS amount</b> | Optimization of U-A and U-AS amount depending on the membrane properties                       | S33~S35 |

**Table S1.** Summary of performance comparison previously reported and this work in the ZBFLB.

| Modification                                           | Current density (mA cm <sup>-2</sup> ) | Charged capacity (mAh cm <sup>-2</sup> ) | CE (%) | EE (%) | Cycle number | Cycle life (h) | Ref.      |
|--------------------------------------------------------|----------------------------------------|------------------------------------------|--------|--------|--------------|----------------|-----------|
| Viologen modified electrode                            | 10                                     | 24.3                                     | 96     | 85     | 400          | 1905           | 1         |
| N doped porous carbon electrode                        | 5                                      | 5                                        | 85.0   | 80.0   | 1000         | 1000           | 2         |
| Exfoliated COF                                         | 6.7                                    | 0.73                                     | 99     | -      | 218          | 1000           | 3         |
| Br <sub>2</sub> complex additive with porous electrode | 15                                     | 1                                        | 99.9   | 94.0   | 11,000       | 733            | 4         |
| High concentration of ZnBr <sub>2</sub> electrolyte    | 5                                      | 1                                        | 95.0   | 79.0   | 2500         | 1666           | 5         |
| Polybromide confiner-modified electrode                | 8                                      | 2                                        | 92.1   | 74.5   | 1200         | 1000           | 6         |
| CCl <sub>4</sub> additive in electrolyte               | 5                                      | 0.8                                      | 96.0   | 81.0   | 200          | 67             | 7         |
| Functionalized MOF composite membrane                  | 10                                     | 2.46                                     | 98.0   | 81.0   | 5000         | 2460           | This work |
|                                                        | 10                                     | 24.6                                     | 93.2   | 80.7   | 20           | 95             |           |
|                                                        | 10                                     | 98.45                                    | 78.7   | 69.1   | 70           | 1200           |           |

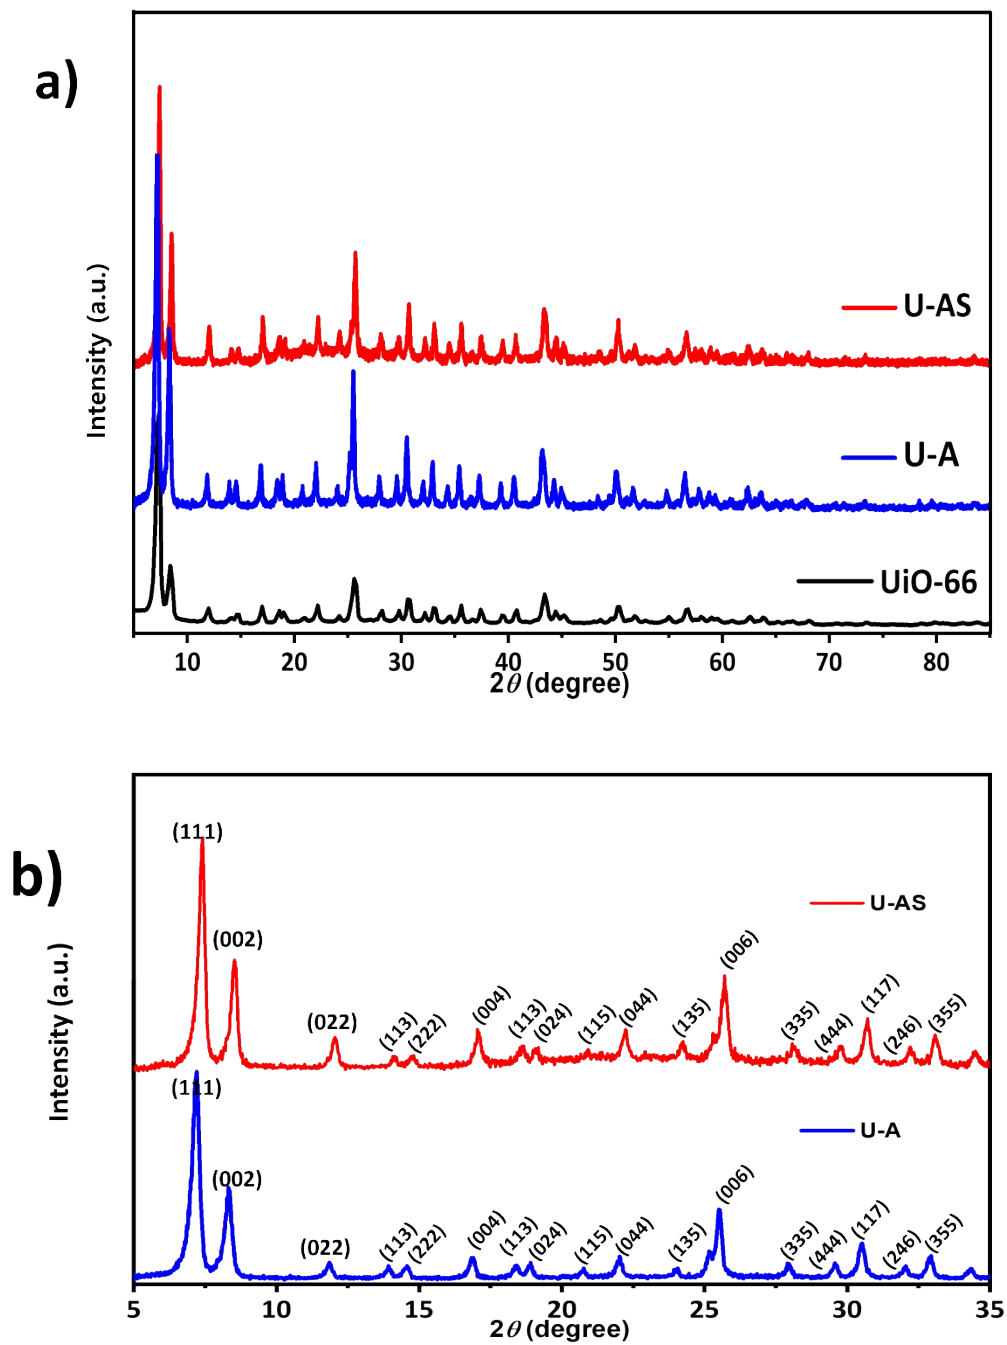

**Fig. S1** The XRD results of (a) UiO-66, U-A and U-AS, and (b) Miller indices of U-A and U-AS.

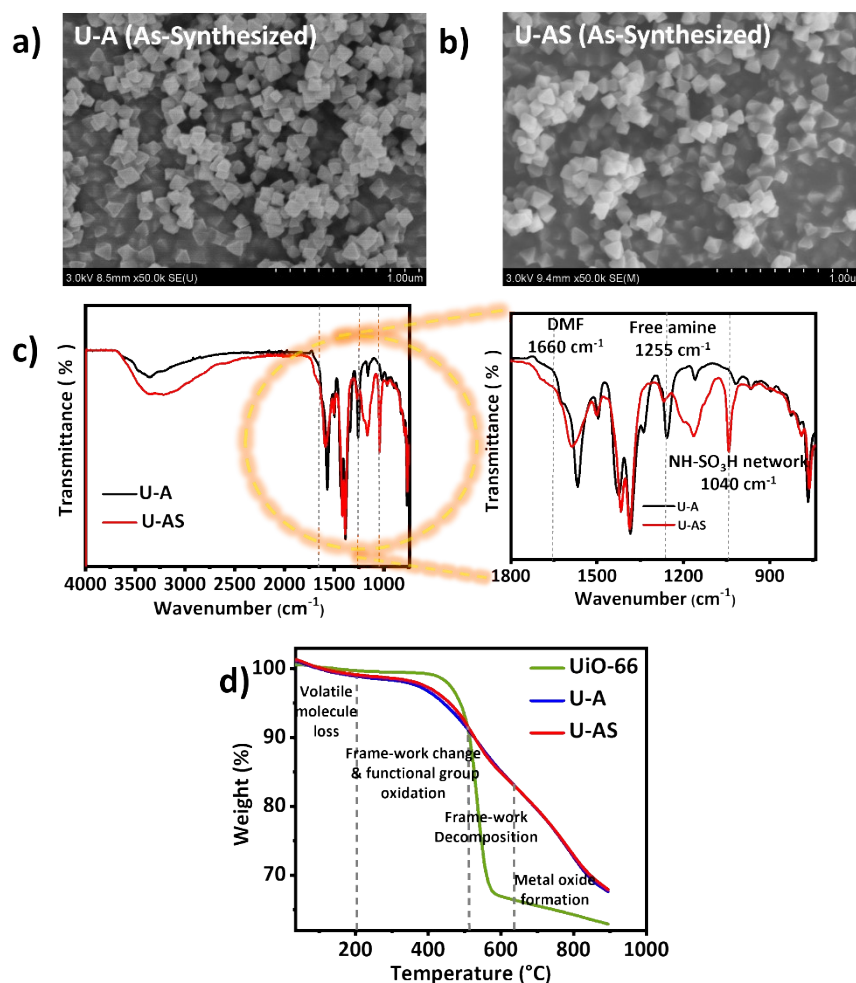

**Fig. S2** SEM images of (a) U-A as-synthesized and (b) U-AS as-synthesized. (c) FT-IR results of U-A and U-AS. (d) TGA curves of UiO-66, U-A and U-AS.

Due to the functional groups, U-A and U-AS showed significantly different thermal decomposition behavior from UiO-66 in Fig. S2d. In addition, U-A and U-AS showed a similar trend in TGA results. The adsorbed volatile molecules were evaporated up to about 200 °C. The U-A and U-AS showed more weight loss than the UiO-66 in this region, with more guest water molecules in the pores or OH groups due to the  $\text{-NH}_2$  and  $\text{-SO}_3\text{H}$  functional groups. In particular, the U-AS sample showed a slower weight drop than the U-A from 200 to 500 °C. This may be due to the oxidation of the pendant alkyl and  $\text{-SO}_3\text{H}$  groups in the U-AS. As the 2-aminoterephthalic acid or terephthalic acid was decomposed, the framework structure was disintegrated between 500 and 650 °C. U-A and U-AS showed less weight

loss than UiO-66. The framework of UiO-66 was completely decomposed before 600 °C, whereas the framework of U-A and U-AS was maintained even after 600 °C due to the presence of -NH<sub>2</sub> group, which is more stable in an N<sub>2</sub> condition.

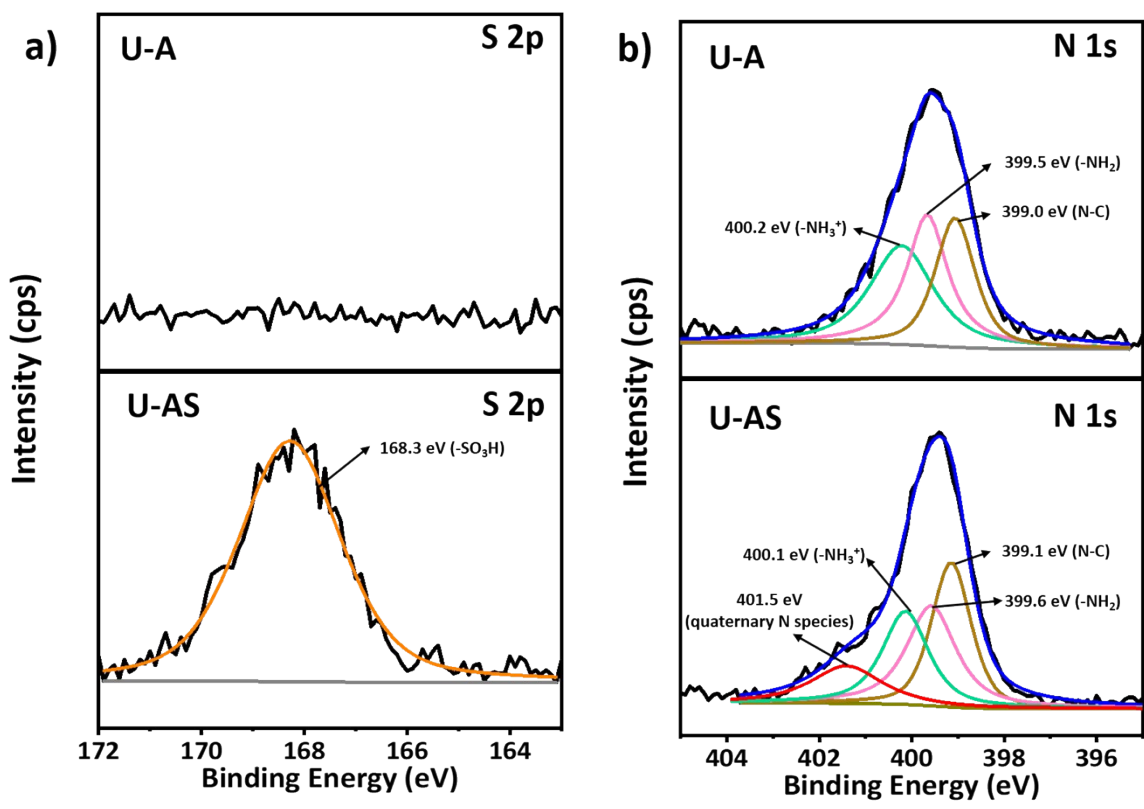

**Fig. S3** High-resolution (a) S2p spectrum of U-A and U-AS; (b) N1s spectrum of U-A and U-AS in XPS.



**Table S2.** The CHNS elemental analysis of UiO-66, U-A and U-AS.

|        | C (%) | H (%) | N (%) | S (%) |
|--------|-------|-------|-------|-------|
| UiO-66 | 35.81 | 2.21  | -     | -     |
| U-A    | 32.74 | 2.93  | 5.02  | -     |
| U-AS   | 39.50 | 4.05  | 4.06  | 10.44 |

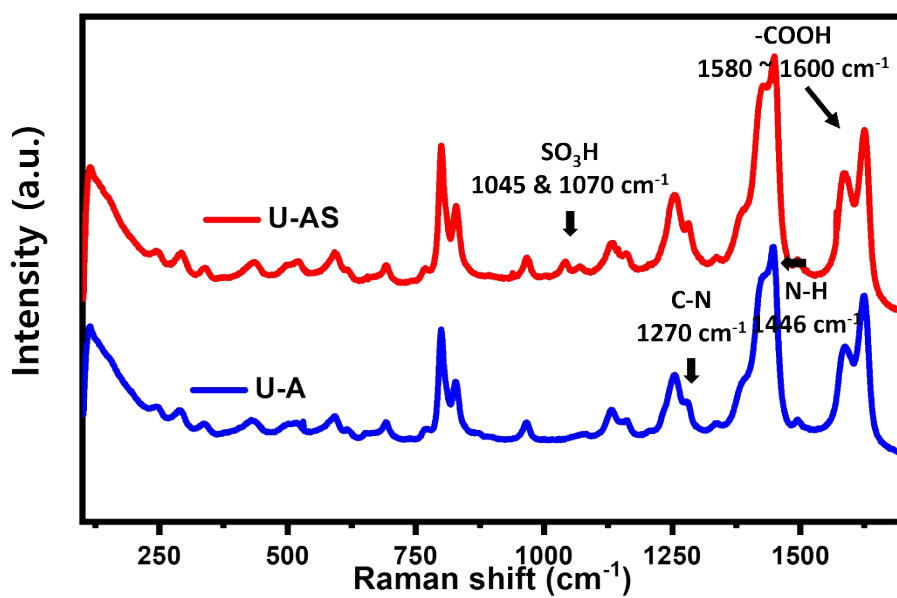

Fig. S4 Raman spectrum of U-A and U-AS as-synthesized.

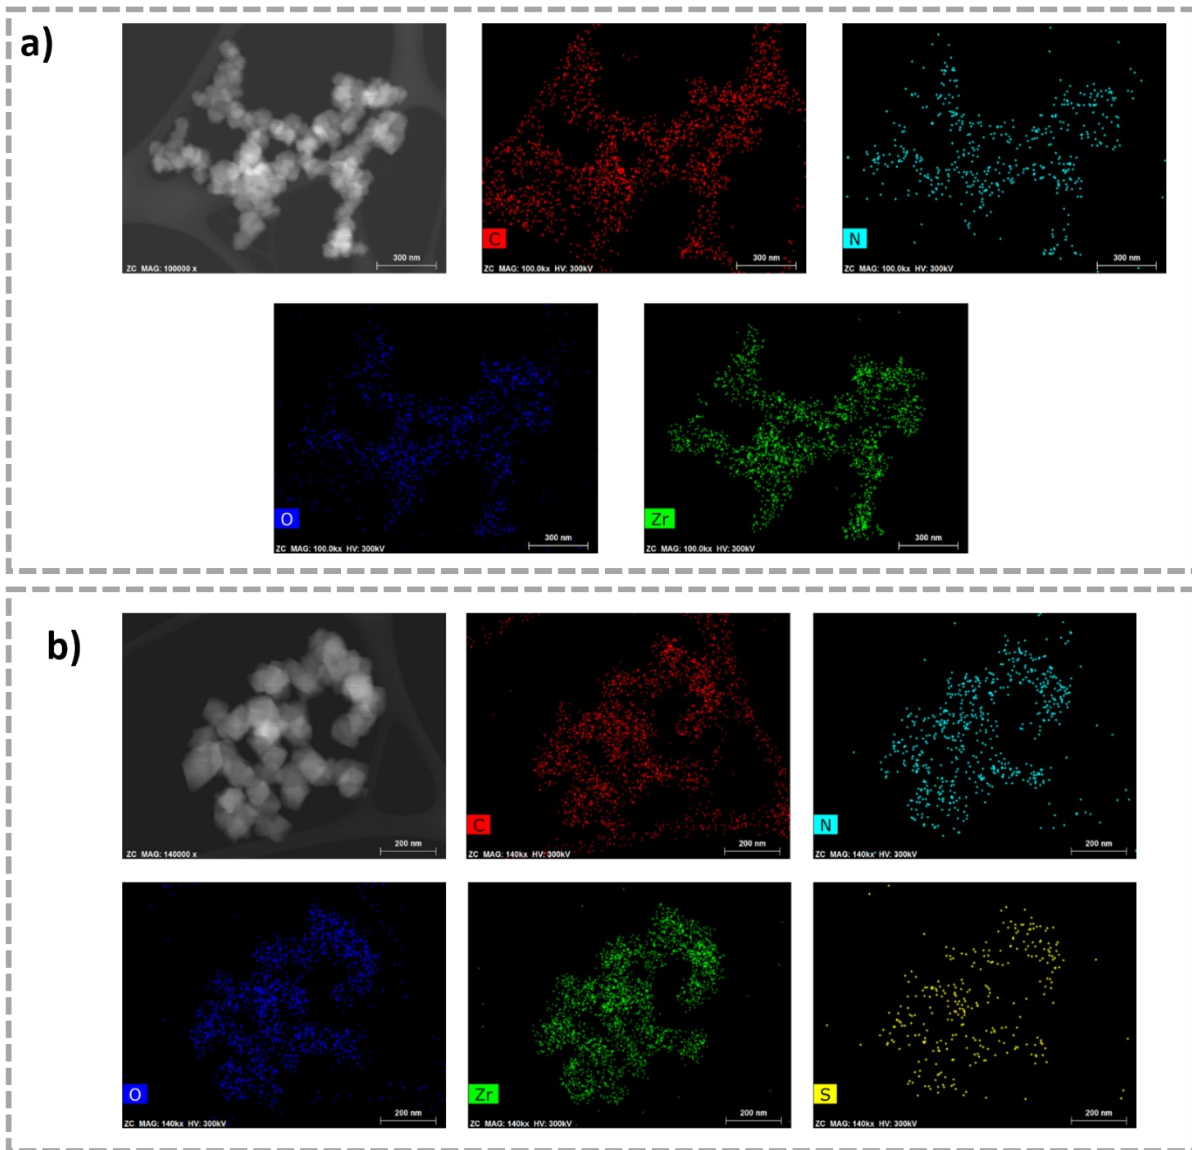

**Fig. S5** TEM image and element mapping images of (a) U-A for C, N, O, Zr and (b) U-AS for C, N, O, Zr, S.

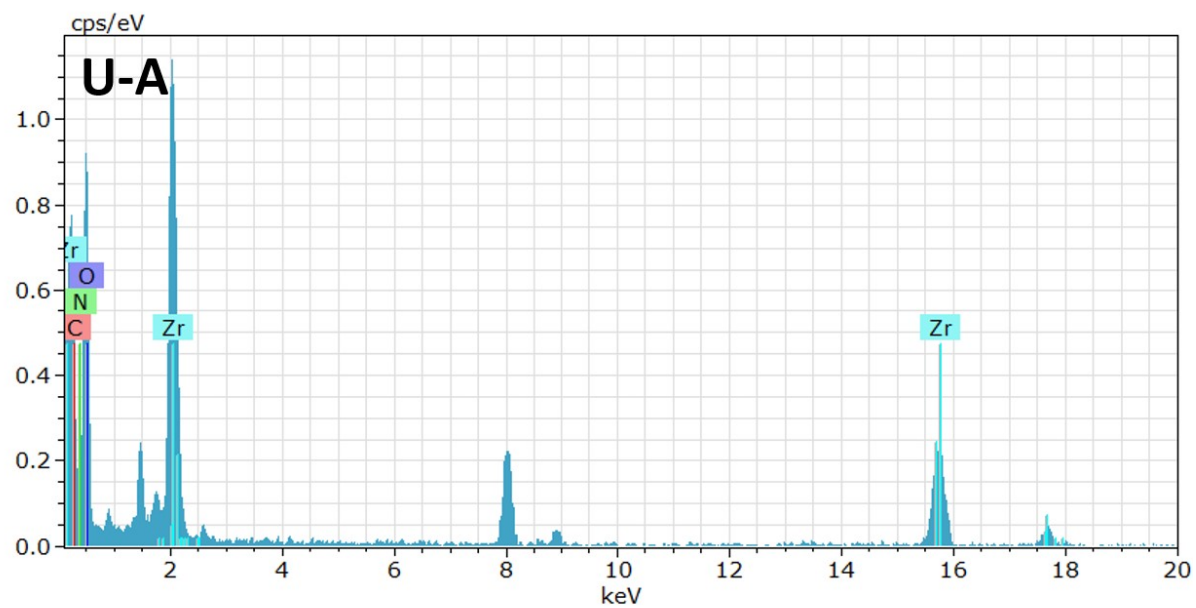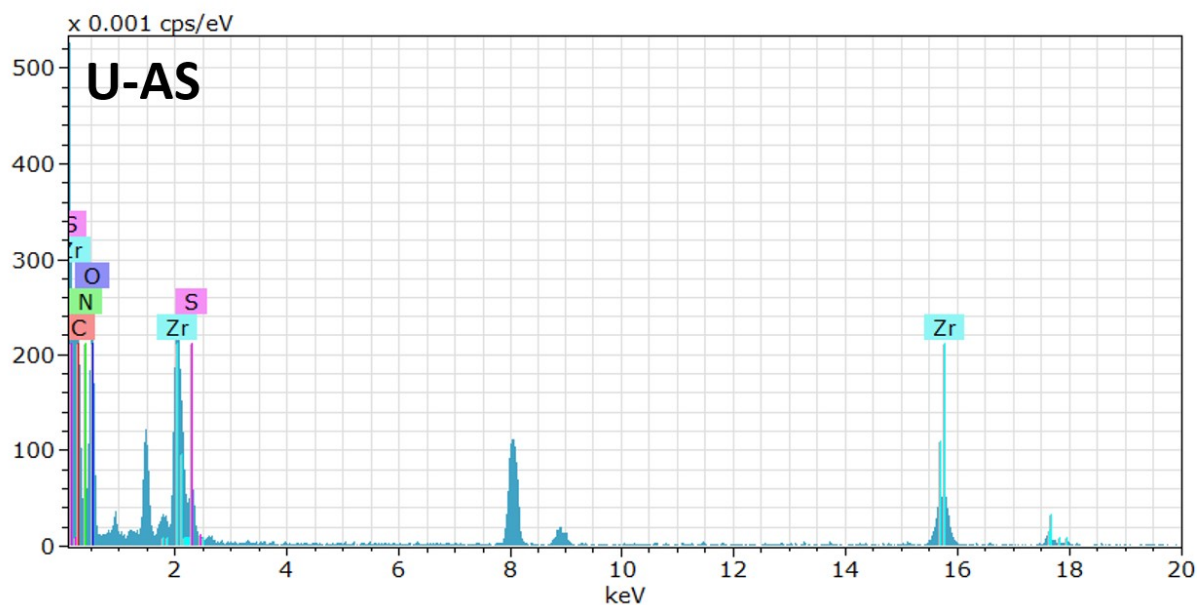

**Fig. S6** EDX spectrum of U-A and U-AS.

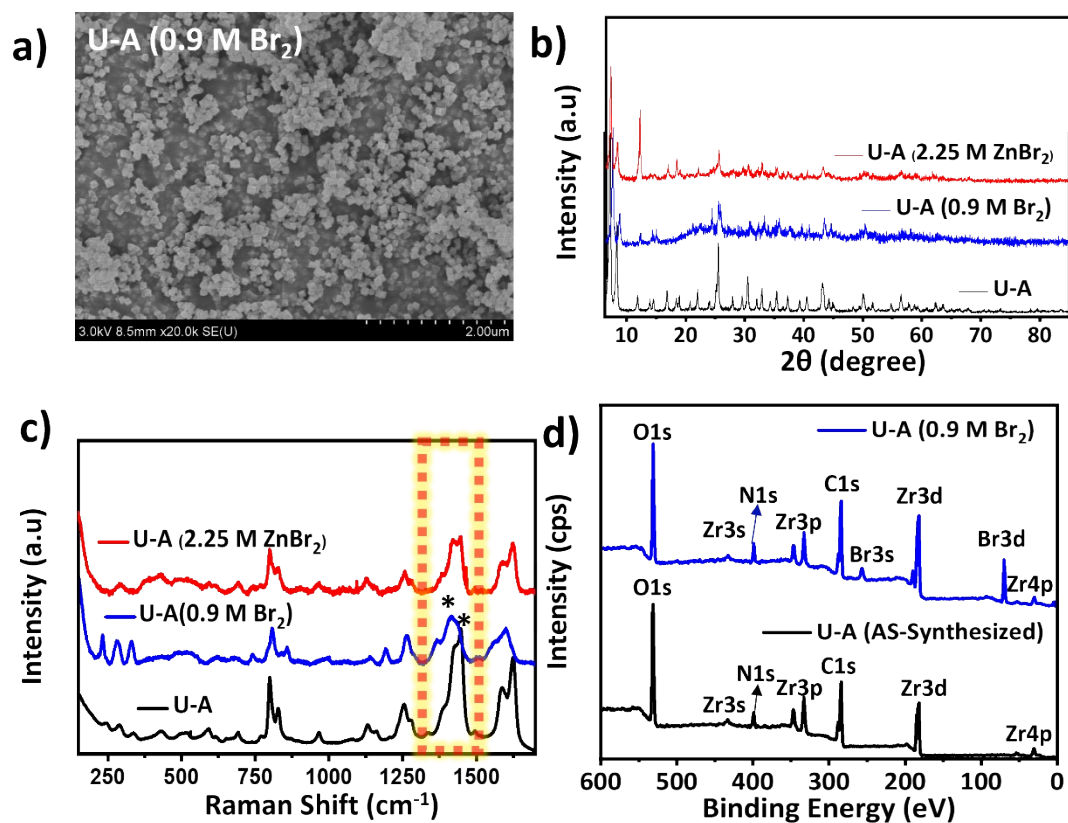

**Fig. S7** After hydrolytic stability test of U-A; (a) SEM images of U-A under 0.9 M Br<sub>2</sub> solution, (b) XRD patterns of U-A, (c) Raman spectrum of U-A and (d) XPS spectrum of U-A.

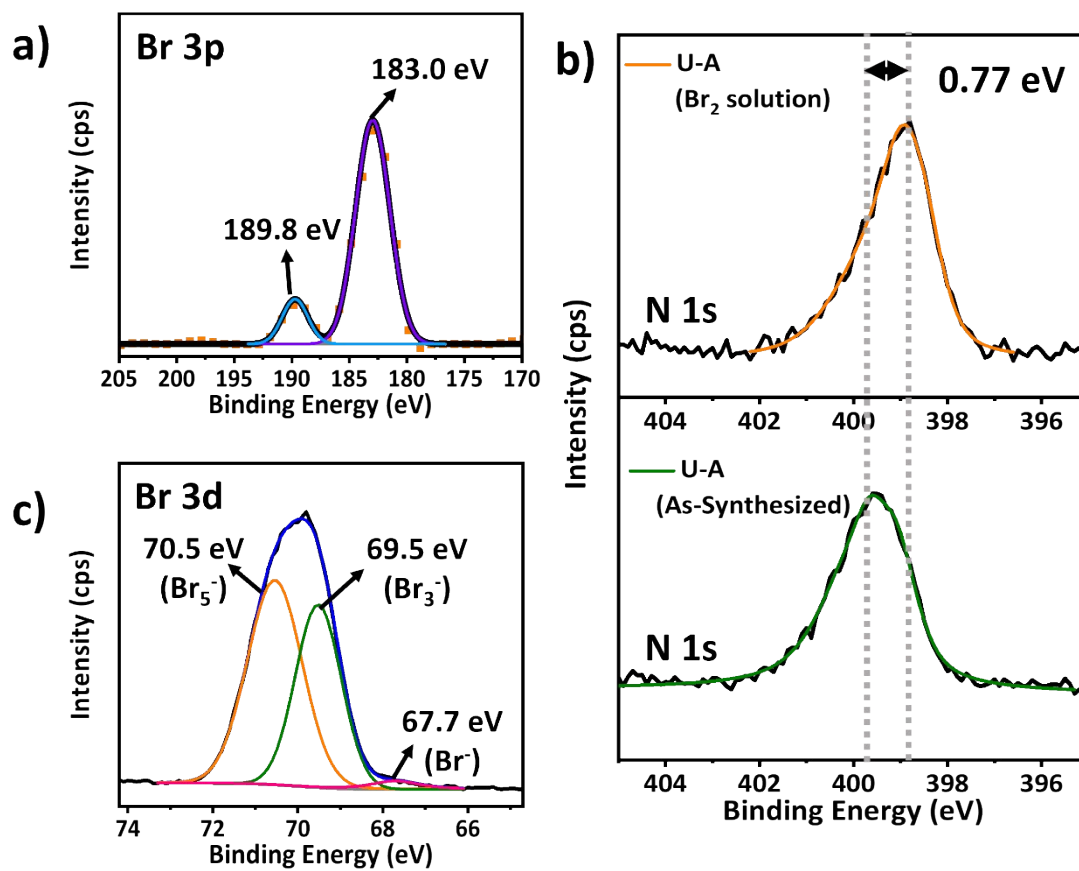

**Fig. S8** XPS spectrum after hydrolytic stability test of U-A in 0.9 M Br<sub>2</sub> solution; (a) fitted Br 3p, (b) fitted N1s and (c) fitted Br 3d.

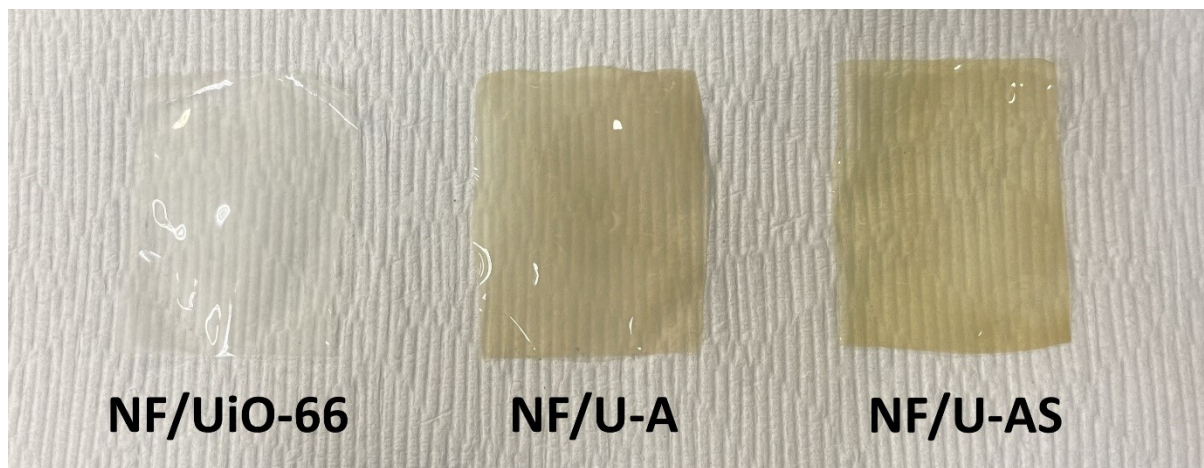

**Fig. S9** Images of NF/UiO-66, NF/U-A and NF/U-AS membranes.

**Table S3.** Properties of membranes.

| Membranes | Water uptake (%) | Contact angle (°) | Ion transport number (t) | Hydrophilic domain size (nm) | Ion conductivity (mS cm <sup>-1</sup> ) | Br <sub>2</sub> concentration at 12 h (mM L <sup>-1</sup> ) |
|-----------|------------------|-------------------|--------------------------|------------------------------|-----------------------------------------|-------------------------------------------------------------|
| NRE-212   | 24.20            | 58.55             | 0.30                     | 4.43                         | 12.37                                   | 59.67                                                       |
| NF/UiO-66 | 23.15            | 68.62             | 0.37                     | 4.60                         | 5.12                                    | 51.59                                                       |
| NF/U-A    | 21.86            | 67.67             | 0.67                     | 4.08                         | 3.38                                    | 35.79                                                       |
| NF/U-AS   | 34.12            | 31.21             | 0.51                     | 3.91                         | 12.21                                   | 44.05                                                       |



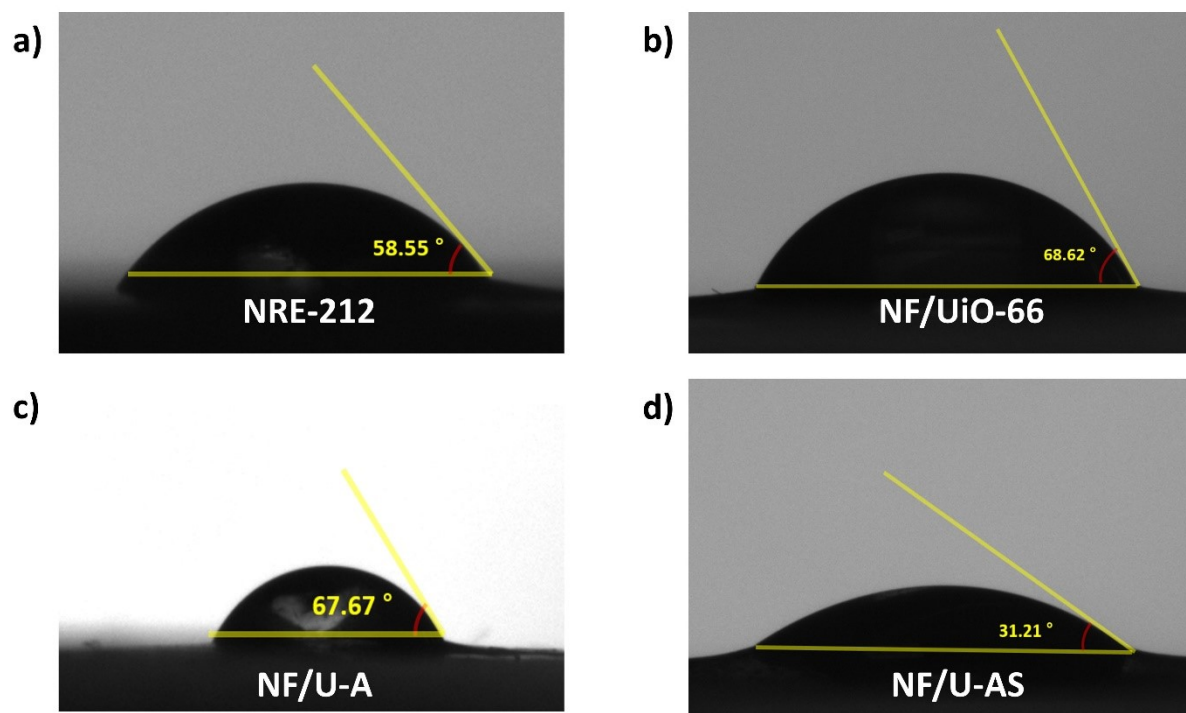

**Fig. S10** Contact angle of membranes; (a) NRE-212, (b) NF/UiO-66, (c) NF/U-A and (d) NF/U-AS.

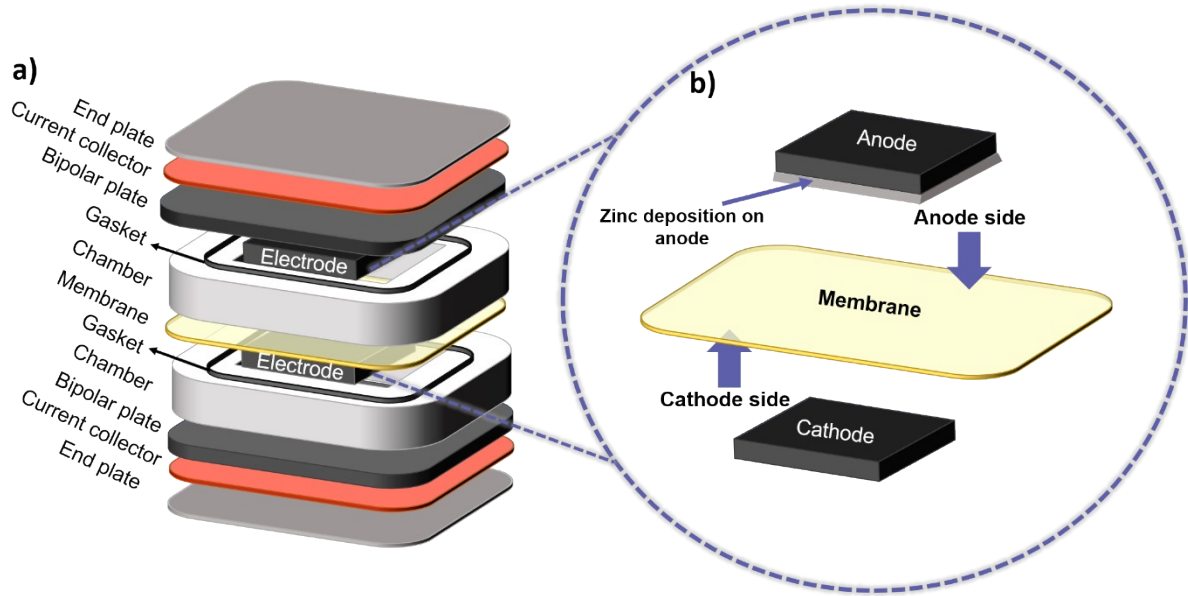

**Fig. S11** Schematic of (a) Zinc/Bromine flowless single cell and (b) membrane sandwiched between anode and cathode.

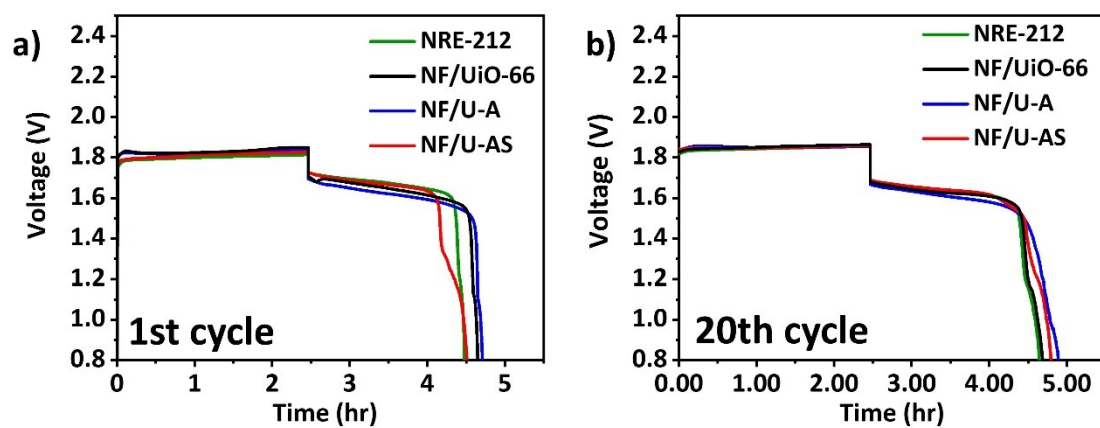

**Fig. S12** Charge-discharge voltage curves of ZBFLB at 10% DOC (a) 1st cycle and (b) 20th cycle.

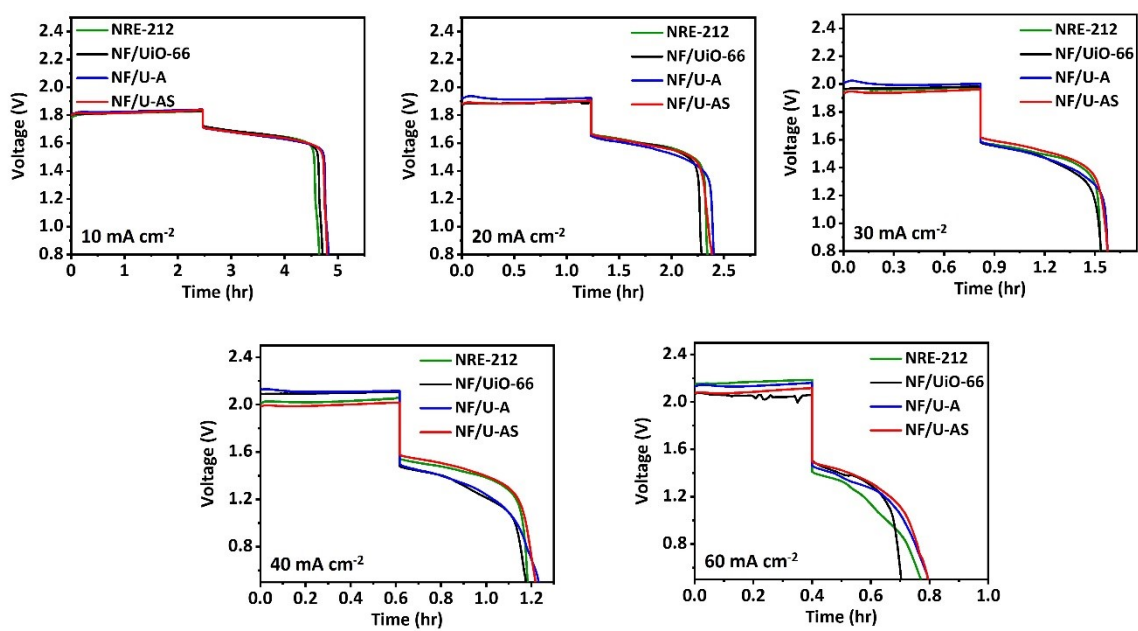

**Fig. S13** Charge-discharge voltage curves of ZBFLB depending on current density at 10% DOC.

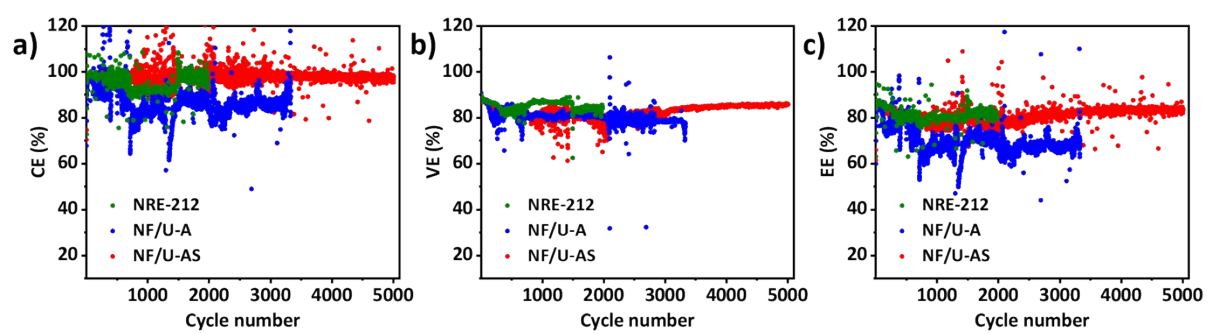

**Fig. S14** The ZBFLB performance test with 1% DOC at  $10 \text{ mA cm}^{-2}$ : (a) CE, (b) VE and (c) EE.

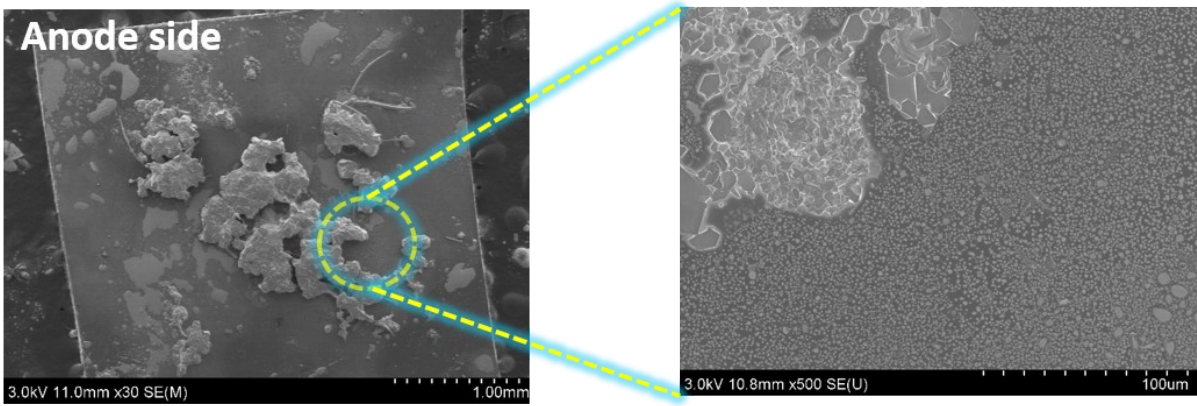

**Fig. S15** FE-SEM images of NF/U-A surface after about 3000 cycles at 1% DOC with 10 mA cm<sup>-2</sup>.

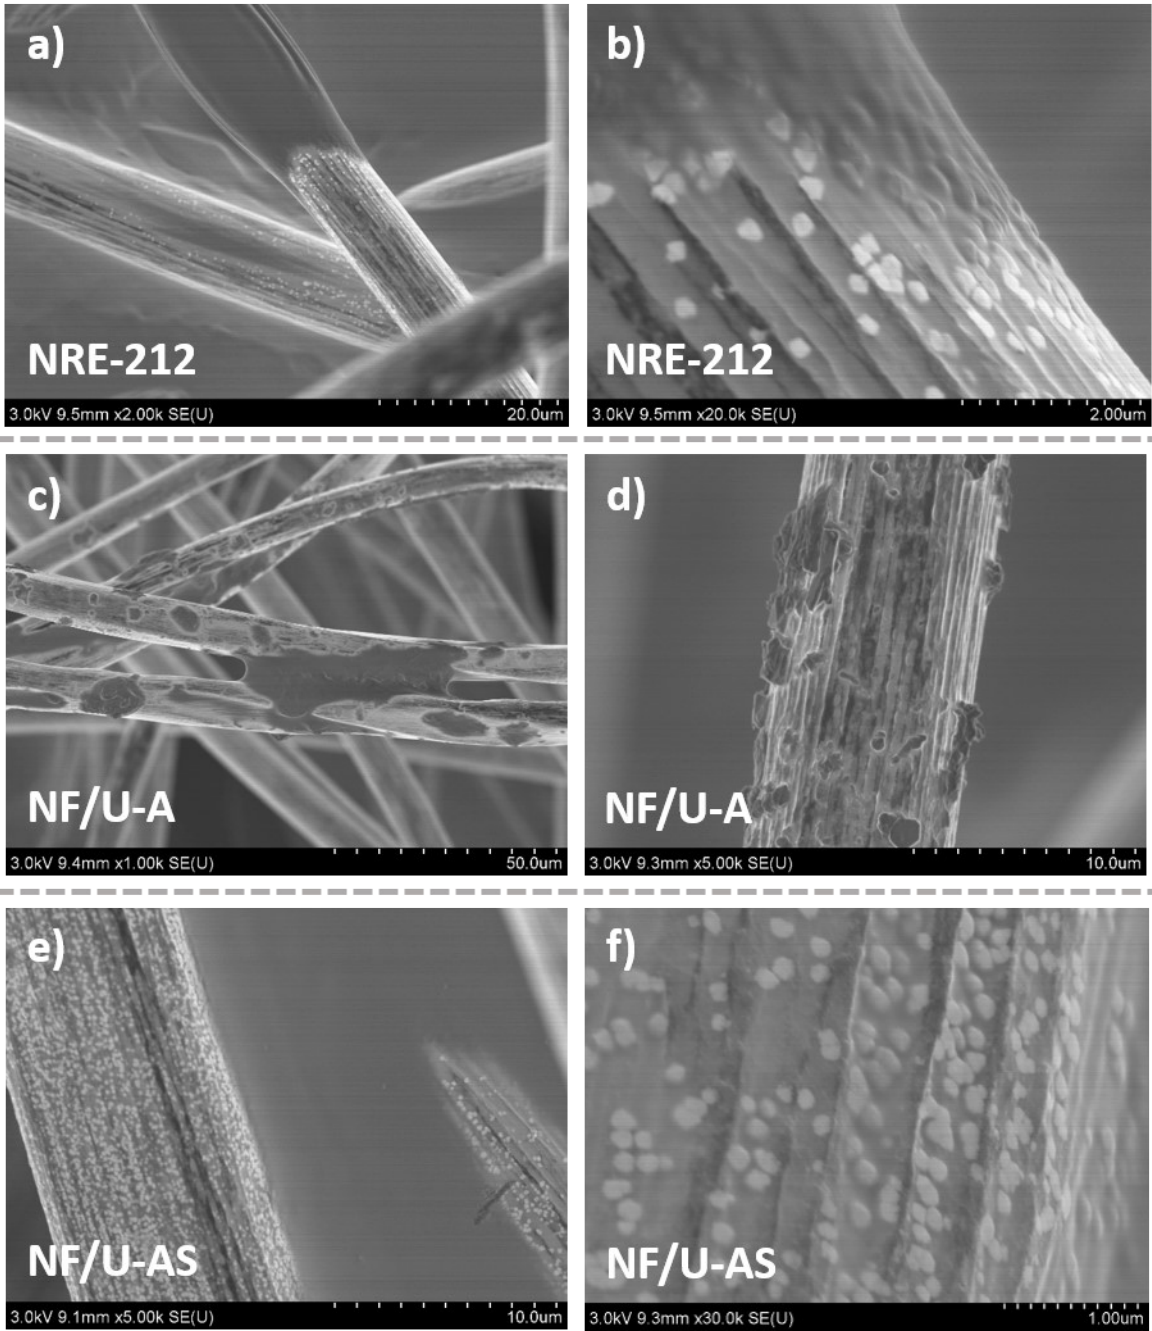

**Fig. S16** FE-SEM images of Zn deposition on anode at 1% DOC. (a, b) NRE-212, (c, d) NF/U-AS and (e, f) NF/U-AS were applied to ZBFLB, respectively.

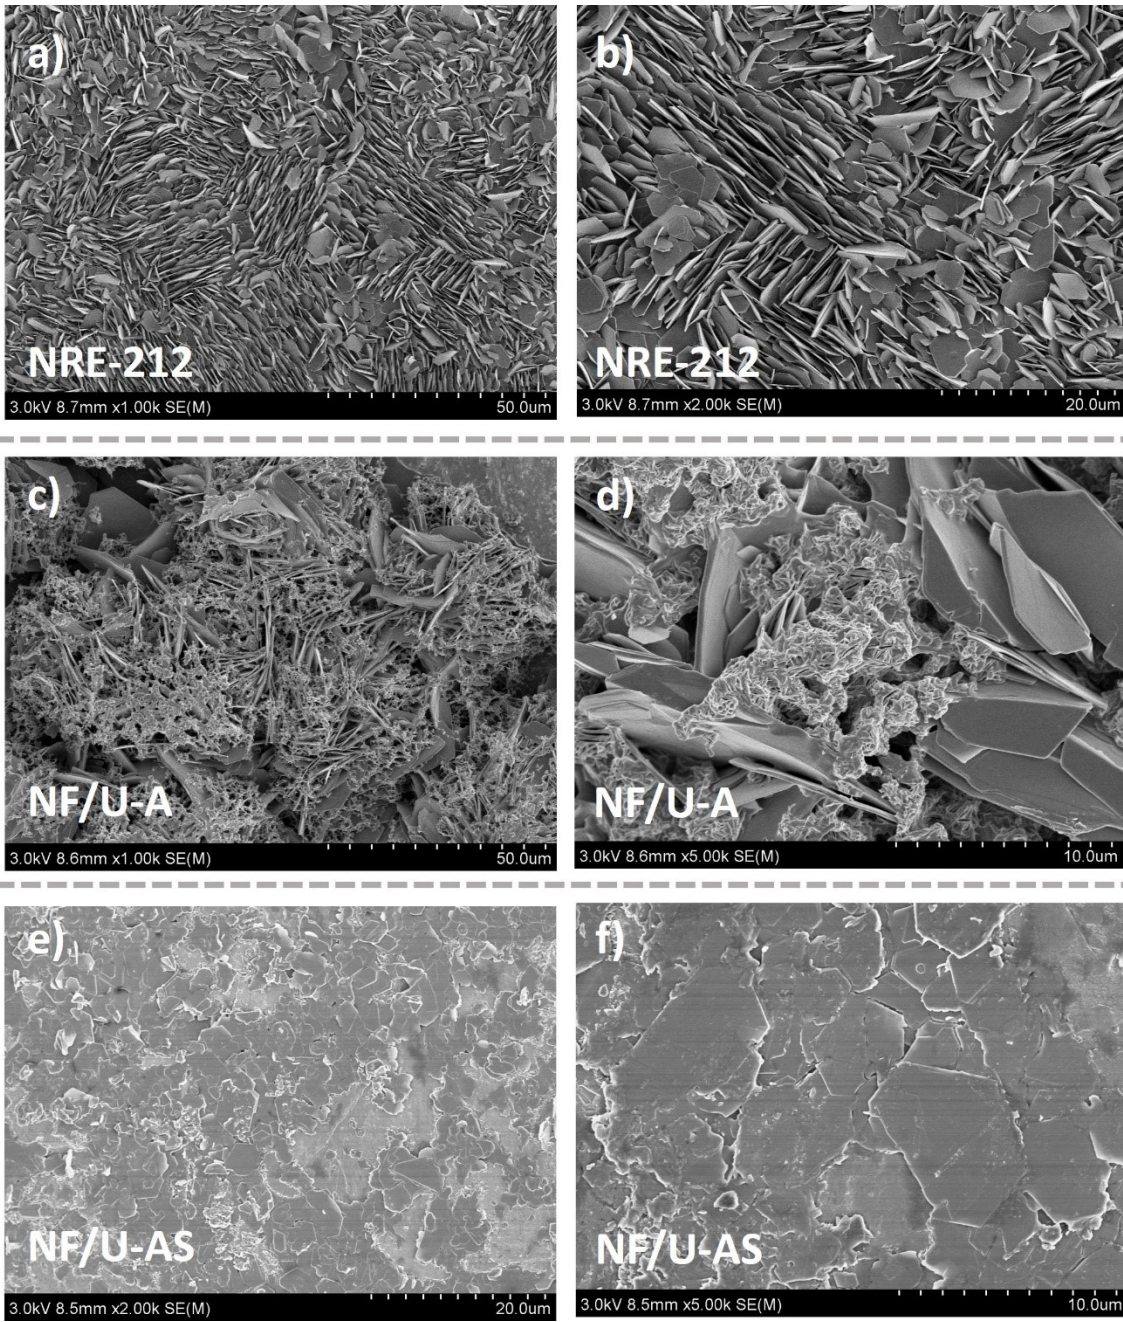

**Fig. S17** FE-SEM images of Zn deposition in Zn symmetric cells at  $1 \text{ mAh cm}^{-2}$  with  $1 \text{ mA cm}^{-2}$  after 5 cycles: (a, b) NRE-212, (c, d) NF/U-AS and (e, f) NF/U-AS.



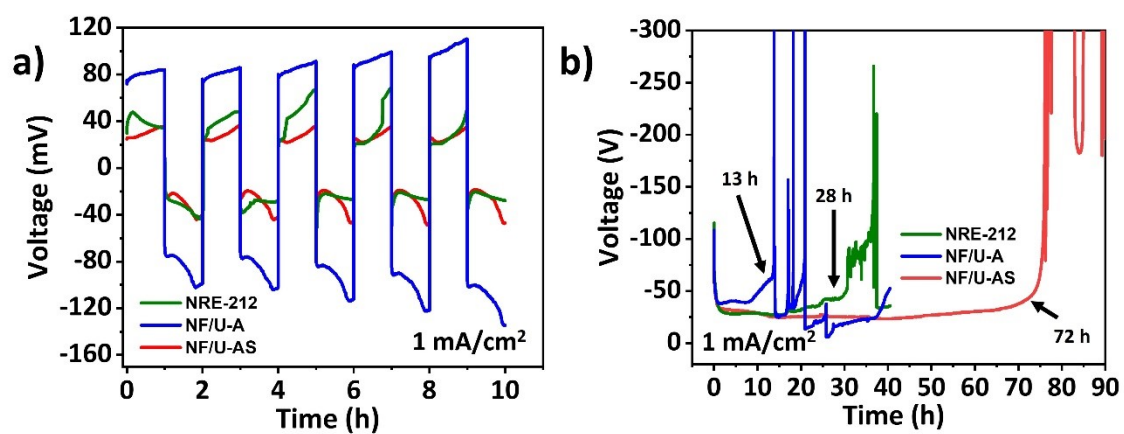

**Fig. S18** (a) Cycling of Zn symmetric cell employing NRE-212, NF/U-A, and NF/U-AS, (b) Chronopotentiometry of Zn symmetric cells at  $1 \text{ mA cm}^{-2}$  for short-circuit time measurement depending on membranes.

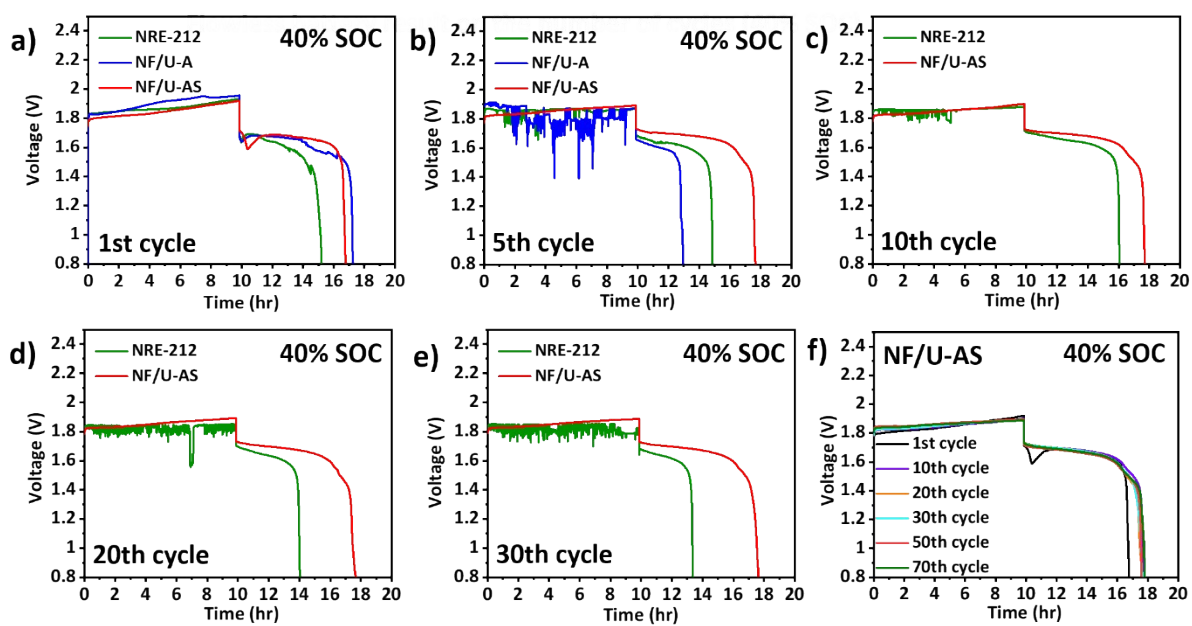

**Fig. S19** Charge-discharge voltage curves of ZBFLB at 40% DOC (a) 1st cycle, (b) 5th cycle, (c) 10th cycle, (d) 20th cycle, (e) 30th cycle and (f) NF/U-AS result according to cycles.

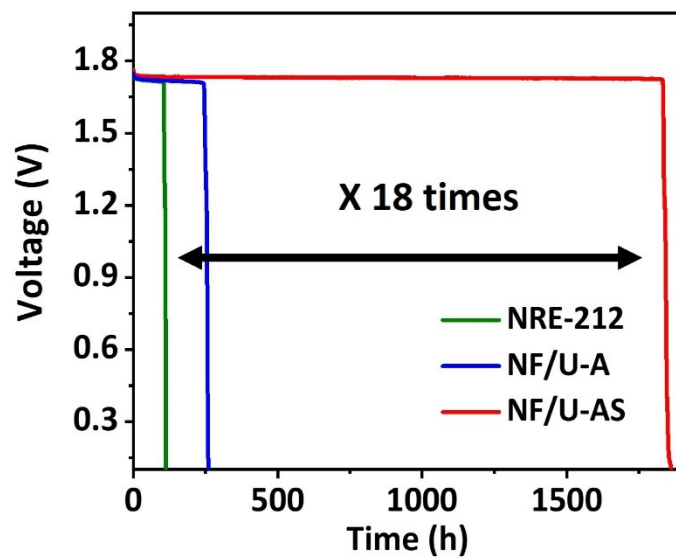

**Fig. S20** The OCV decay curves of NRE-212, NF/U-A, and NF/U-AS after 40% DOC at 10 mA cm<sup>-2</sup>.

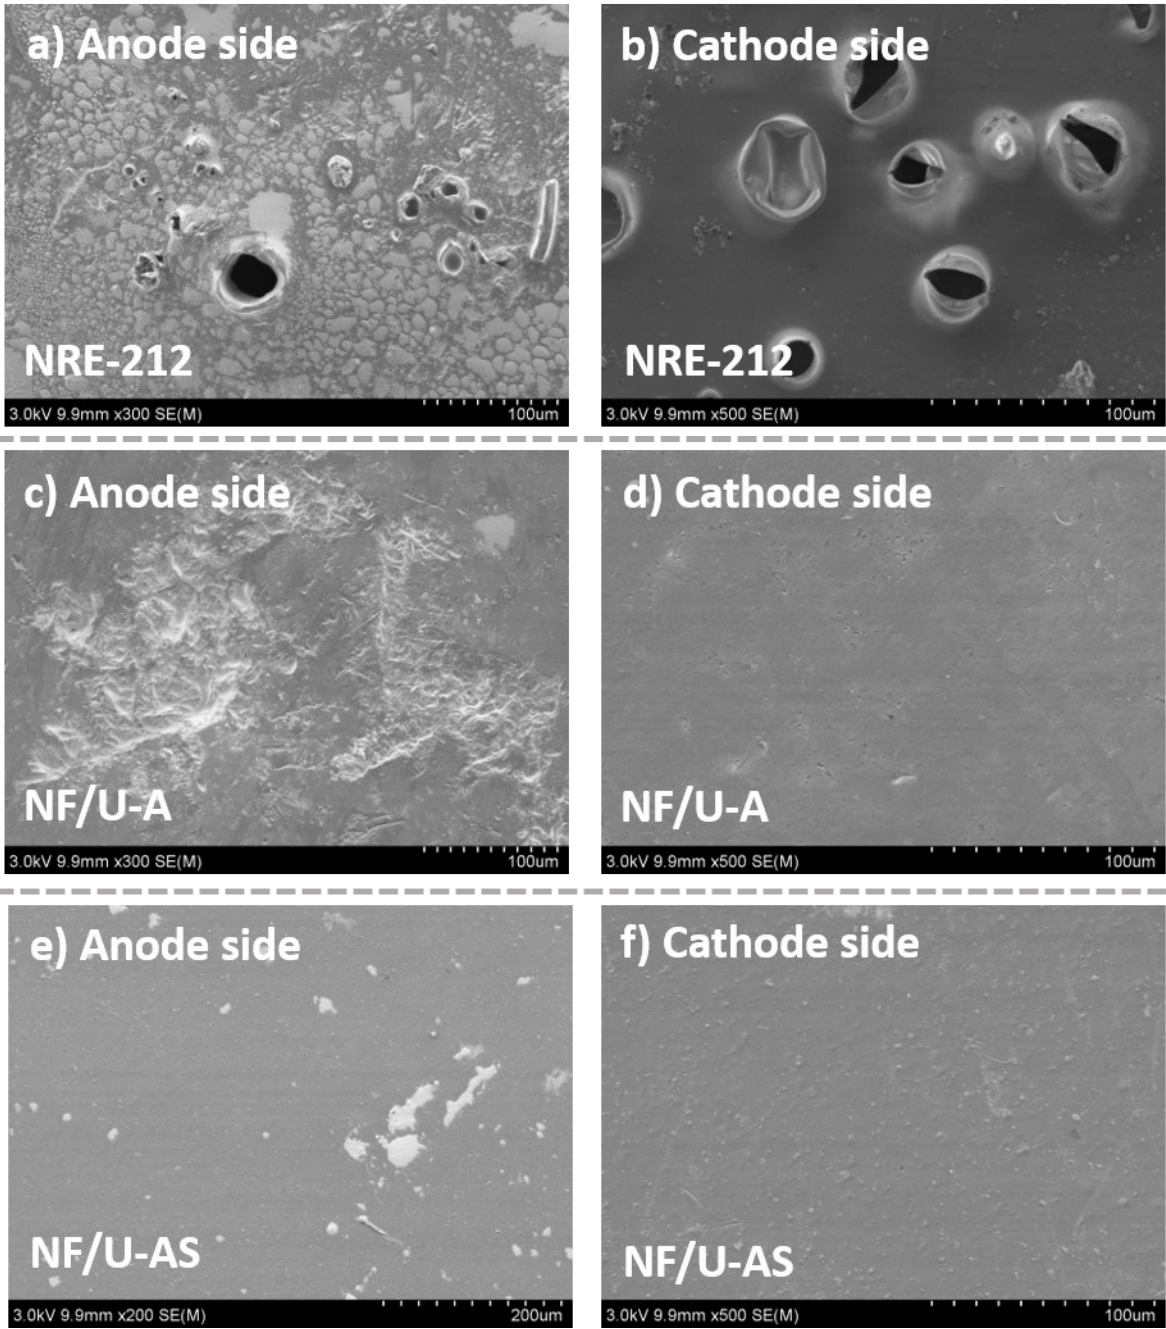

**Fig. S21** FE-SEM images of (a, b) NRE-212, (c, d) NF/U-A and (e, f) NF/U-AS surfaces after cyclability test at 40% DOC.

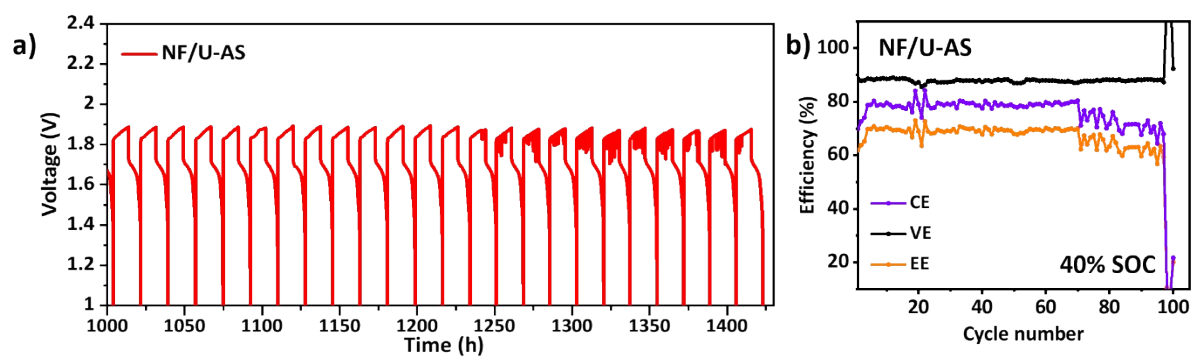

**Fig. S22** The cyclability results of NF/U-AS at 40% DOC with 10 mA cm<sup>-2</sup> of (a) charge-discharge profile and (b) CE, VE, EE results.

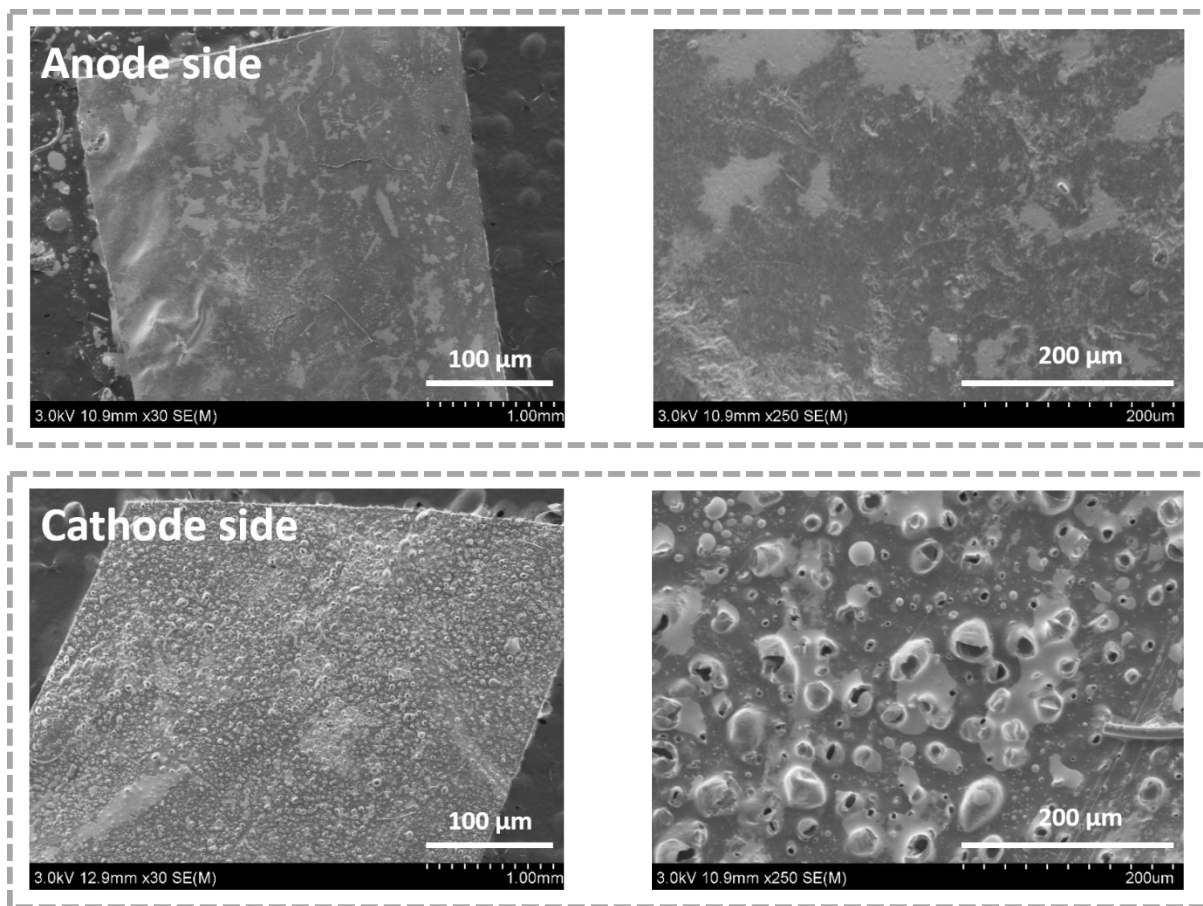

**Fig. S23** FE-SEM images of NF/U-AS after cyclability test at 40% DOC over 1400 h.

## Experiment

The ion conductivity ( $\delta$ ) of membranes was obtained by dividing the area resistance of the membrane thickness from the area resistance values. The area resistance was measured without carbon-felt electrodes in the flowless single cell. The membrane is divided into two compartments with an effective area of 3.92 cm<sup>2</sup>. The two compartments were filled out fully with 2.25 ZnBr<sub>2</sub> + 0.5 M ZnCl<sub>2</sub>. The area resistance was evaluated with an electrochemical impedance analyzer (biologic potentiostat analyzer) at an amplitude of 10 mV in the frequency range of 1 Hz to 100 kHz. The area resistance was calculated by the formula below:

$$ASR = A \times (r_1 - r_2)$$

Where A is the effective area,  $r_1$  is the ohmic resistance of the cell with the membrane, and  $r_2$  is solution resistance without the membrane.

Ion transport numbers of membranes were measured by the liquid junction potential of the H-type with two Ag/AgCl reference electrodes filled with a 3 M NaCl. The left and right of the cell were filled with 0.01 M ZnBr<sub>2</sub> and 0.6 M ZnBr<sub>2</sub>, respectively. The Ag/AgCl electrodes were located in each cell. Using the measured open-circuit voltage (OCV) values derived from the difference in concentration of 0.01 M ZnBr<sub>2</sub> and 0.6 M ZnBr<sub>2</sub> electrolytes, the transference number was obtained by the following the Eq. (1) and (2)

$$E_j = \phi^\beta - \phi^\alpha = -\frac{RT}{F} \sum_i \int_\alpha^\beta \frac{t_i}{Z_i} d \ln a_i, \quad (1)$$

$$t_+ + t_- = 1, \quad (2)$$

where,  $E_j$  means the liquid junction potential corresponding to OCV. R is the ideal gas constant.

T is the temperature. F is the Faraday constant.  $t_i$  is the ion transference number and  $z_i$  is the charge of the ion,  $a_i$  is the ion activity.  $\alpha$  and  $\beta$  are 0.01 M and 0.6 M ZnBr<sub>2</sub>, respectively.

To investigate the Zn plating behavior according to membranes, Zn symmetric cell was assembled in a 2032 coin cell with 14 mm of Zn metal foil (250  $\mu\text{m}$ ). 2 M ZnSO<sub>4</sub> was used as the electrolyte, and each membrane was stored in the 2 M ZnSO<sub>4</sub> for more than 24 hours before being applied to Zn symmetric coil cell. The cell was cycled at 1 mA h cm<sup>-2</sup> at 1 mA cm<sup>-2</sup>. After 5 cycles, Zn plating was performed for 1 mAh cm<sup>-2</sup>, and the morphology of Zn deposition was observed depending on membranes through SEM. Additionally, to demonstrate that membranes are capable of uniform Zn deposition, short-circuit time measurements were performed in a Zn symmetric cell. The short-circuit time was determined from the time required for the cell voltage to suddenly fluctuate at 1 mA cm<sup>-2</sup>.



## Optimization of U-A and U-AS amount depending on the membrane properties

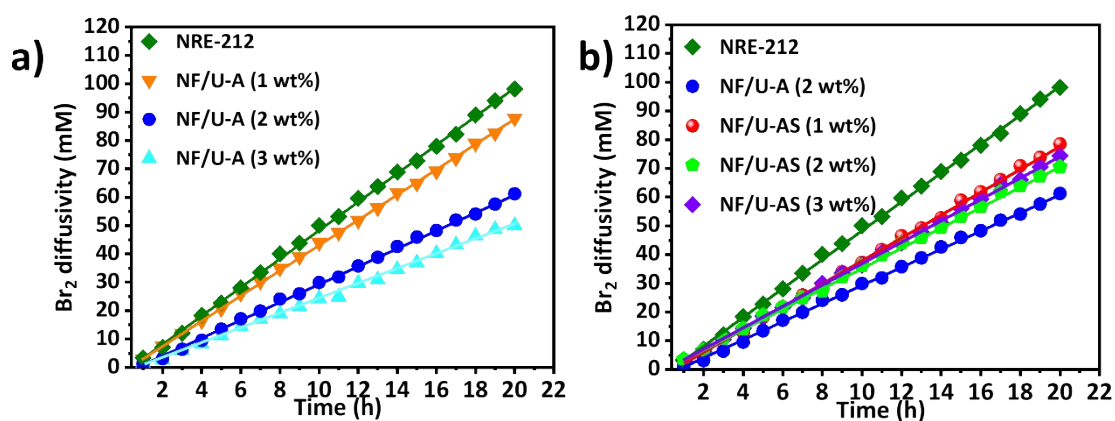

**Fig. S24** The Br<sub>2</sub> diffusivity: a) NF/U-A membranes according to different U-A amounts and b) NF/U-AS membranes according to different U-AS amounts. The NRE-212 membrane was used for comparison.

To optimize the U-A and U-AS content in the polymer matrix as a composite membrane, membrane properties were investigated according to U-A and U-AS amount, respectively. The U-A and U-AS contents of 1.0, 2.0, and 3.0 wt% were introduced based on the weight of the Nafion membrane not containing any additive.

First, the Br<sub>2</sub> diffusivity was measured at different times to confirm the Br<sub>2</sub> crossover through the membrane (Fig. S24). In the case of optimization for U-A content, as the U-A content increased, a greater amount of Br<sub>2</sub> was captured, demonstrating lower Br<sub>2</sub> diffusivity (Fig. S21a). As a result, the NF/U-A (3 wt%) exhibited the lowest Br<sub>2</sub> crossover property. The NF/U-AS membranes indicated low Br<sub>2</sub> diffusivity in the order of NF/U-AS 1 wt% < NF/U-AS 2

wt% and NF/U-AS 3 wt% (Fig. S24b). However, no significant differences were found in Br<sub>2</sub> diffusivity of NF/U-AS membranes depending on the U-AS amount introduced. As the U-AS content in the U-AS-based membrane varies, the sulfonic group on the surface of the U-AS also becomes different, not following the same trend as U-A based membranes.

In addition to Br<sub>2</sub> diffusivity, the membrane properties such as area-specific resistance (ASR), ion conductivity, the concentration at which Br<sub>2</sub> crossover occurred based on 12 hours, water uptake and contact angle are summarized in Table S4. The NF/U-A 3 wt% membrane had the lowest ion conductivity as a high amount of the U-A interacted with the sulfonic group of Nafion. Even though the NF/U-AS membranes were introduced into the Nafion matrix, they maintained ion conductivity as the NF/U-AS did not suffer the loss of the ion-conducting group due to the functionalization of the sulfonate group on U-AS. In particular, NF/U-AS (2 wt%) was determined to be the optimal amount based on appropriate ionic conductivity, high hydrophilicity of the surface, large electrolyte absorption ability, and low crossover property. NF/U-A was also determined to be 2 wt%, which has the most suitable properties among NF/U-A membranes with a content of 1 to 3 wt%. Based on the results, NF/U-A (2 wt%) and NF/U-AS (2 wt%) were referred to as NF/U-A and NF/U-AS, respectively, and the battery performances with the comparison of membrane characteristics were dealt with in the main script.

**Table S4.** Summary of membrane properties for NF/U-A and NF/U-AS membranes depending on the additive amount

| Membranes       | Water uptake (%) | Contact angle (°) | Ion conductivity (mS cm <sup>-1</sup> ) | Br <sub>2</sub> concentration at 12 h (10 mM L <sup>-1</sup> ) |
|-----------------|------------------|-------------------|-----------------------------------------|----------------------------------------------------------------|
| NRE-212         | 24.20            | 58.55             | 12.37                                   | 59.67                                                          |
| NF/U-A (1 wt%)  | 23.01            | 65.27             | 7.85                                    | 51.80                                                          |
| NF/U-A (2 wt%)  | 21.86            | 67.67             | 3.38                                    | 35.79                                                          |
| NF/U-A (3 wt%)  | 22.45            | 76.07             | 2.45                                    | 29.75                                                          |
| NF/U-AS (1 wt%) | 32.14            | 35.98             | 12.29                                   | 46.63                                                          |
| NF/U-AS (2 wt%) | 34.12            | 31.21             | 12.21                                   | 44.05                                                          |
| NF/U-AS (3 wt%) | 35.87            | 23.40             | 12.12                                   | 44.05                                                          |

## References

- 1 S. Hee Han, S. Kim, H. Yong Lim, S. Park, K. Shin, S. Kim, H. T. Kim, S. Kyu Kwak, C. Yang and N. S. Choi, *Chem. Eng. J.*, 2023, **464**, 142624.
- 2 J. H. Lee, Y. Byun, G. H. Jeong, C. Choi, J. Kwen, R. Kim, I. H. Kim, S. O. Kim and H. T. Kim, *Advanced Materials*, 2019, **31**, 1–10.
- 3 Y. Zhang, C. Wei, M. X. Wu, Y. Wang, H. Jiang, G. Zhou, X. Tang and X. Liu, *Chemical Engineering Journal*, 2023, **451**, 138915.
- 4 L. Gao, Z. Li, Y. Zou, S. Yin, P. Peng, Y. Shao and X. Liang, *iScience*, 2020, **23**, 101348.
- 5 S. Liu, J. Wu, J. Huang, X. Chi, J. Yang and Y. Liu, *Sustain Energy Fuels*, 2022, **6**, 1148–1155.
- 6 W. Wu, S. Xu, Z. Lin, L. Lin, R. He and X. Sun, *Energy Storage Mater*, 2022, **49**, 11–18.
- 7 P. Xu, C. Xie, C. Wang, Q. Lai, W. Wang, H. Zhang and X. Li, *Chemical Communications*, 2018, **54**, 11626–11629.
